# Supplementary material
Source: publisher site journal article supplement (https://www.dovepress.com/get_supplementary_file.php?f=497111.docx)
Supplement: Supplementary file 1 [file get_supplementary_file.php]

**Supplementary Table 1. Relevant clinical characteristics in patients with EKC**

| **Patient** | **Age** | **Evolution time** | **Comorbidities** | **Ocular History** | **Total Score per Eye** | | **Eye Classification According to Total Score** | | **Total Score per patient** |
| --- | --- | --- | --- | --- | --- | --- | --- | --- | --- |
| **OD** | **OS** | **OD** | **OS** | ***(OD+OS)*** |
| 1.Female | 29 | 3 | None | None | 7 | 13 | LAE | MAE | 20 |
| 2.Male | 41 | 7 | None | None | 17 | 13 | MAE | LAE | 30 |
| 3.Female | 56 | 30 | Epilepsy | None | 12 | 2 | MAE | LAE | 14 |
| 4.Female | 20 | 7 | None | None | 17 | 17 | MAE* | LAE | 34 |
| 5.Female | 62 | 15 | None | POAG/Trabe | 14 | 14 | MAE* | LAE | 28 |
| 6.Female | 48 | 15 | Diabetes Hypertension | None | 10 | 6 | MAE | LAE | 16 |
| 7.Male | 36 | 5 | None | None | 18 | 13 | MAE | LAE | 31 |
| 8.Male | 39 | 9 | None | None | 6 | 5 | MAE | LAE | 11 |
| 9.Female | 32 | 5 | None | None | 12 | 7 | MAE | LAE | 19 |
| 10.Male | 48 | 5 | None | POAG/PRDS | 15 | 13 | MAE | LAE | 28 |
| 11.Female | 64 | 7 | None | None | 5 | 17 | LAE | MAE | 22 |
| 12.Male | 72 | 7 | Diabetes | None | 22 | 23 | MAE | LAE | 45 |
| 13.Female | 59 | 13 | Hypertension | Trabeculectomy | 22 | 19 | MAE | LAE | 41 |
| 14.Female | 65 | 7 | Hypertension | None | 4 | 4 | MAE* | LAE | 8 |

POAG (Primary Open Angle Glaucoma), PRDS (Previous Retinal Detachment Surgery)

* OD was considered MAE when the total score was identical in both eyes.

**Supplementary Table 2. Clinical Characteristics per Eye Severity**

| **Patient** | **Affected Eye** | **Eyelid Involvement Score** | **Conjunctival Hyperemia Score** | **Conjunctival Hemorrhages Score** | **Conjunctival Discharge Score** | **Conjunctival Swelling Score** | **Inflammatory Response Score** | **Cornea Involvement Score** | **Total Score per Eye** |
| --- | --- | --- | --- | --- | --- | --- | --- | --- | --- |
| **1.Female** | OD | 2 | 1 | 1 | 1 | 1 | 1 | 0 | 7 |
| OS | 2 | 1 | 2 | 2 | 3 | 3 | 0 | 13 |
| **2.Male** | OD | 1 | 4 | 4 | 1 | 4 | 3 | 0 | 17 |
| OS | 1 | 3 | 2 | 1 | 3 | 3 | 0 | 13 |
| **3.Female** | OD | 2 | 2 | 2 | 1 | 2 | 3 | 0 | 12 |
| OS | 0 | 0 | 0 | 1 | 0 | 1 | 0 | 2 |
| **4.Female** | OD | 2 | 4 | 2 | 3 | 3 | 3 | 0 | 17 |
| OS | 2 | 4 | 2 | 3 | 3 | 3 | 0 | 17 |
| **5.Female** | OD | 1 | 2 | 2 | 3 | 2 | 4 | 0 | 14 |
| OS | 1 | 2 | 2 | 3 | 2 | 4 | 0 | 14 |
| **6.Female** | OD | 2 | 2 | 3 | 1 | 1 | 1 | 0 | 10 |
| OS | 1 | 1 | 1 | 1 | 1 | 1 | 0 | 6 |
| **7.Male** | OD | 2 | 4 | 3 | 1 | 3 | 4 | 1 | 18 |
| OS | 2 | 3 | 2 | 1 | 2 | 3 | 0 | 13 |
| **8.Male** | OD | 1 | 1 | 0 | 1 | 1 | 2 | 0 | 6 |
| OS | 1 | 1 | 0 | 1 | 1 | 1 | 0 | 5 |
| **9.Female** | OD | 2 | 3 | 2 | 1 | 1 | 3 | 0 | 12 |
| OS | 2 | 1 | 1 | 1 | 1 | 1 | 0 | 7 |
| **10.Male** | OD | 2 | 4 | 4 | 1 | 0 | 4 | 0 | 15 |
| OS | 2 | 4 | 2 | 1 | 2 | 2 | 0 | 13 |
| **11.Female** | OD | 1 | 1 | 1 | 1 | 0 | 1 | 0 | 5 |
| OS | 2 | 4 | 2 | 3 | 3 | 3 | 0 | 17 |
| **12.Male** | OD | 2 | 4 | 4 | 4 | 4 | 4 | 0 | 22 |
| OS | 3 | 4 | 4 | 4 | 4 | 4 | 0 | 23 |
| **13.Female** | OD | 1 | 4 | 3 | 4 | 3 | 4 | 3 | 22 |
| OS | 1 | 4 | 2 | 4 | 3 | 4 | 1 | 19 |
| **14.Female** | OD | 1 | 1 | 0 | 1 | 0 | 1 | 0 | 4 |
| OS | 1 | 1 | 0 | 1 | 0 | 1 | 0 | 4 |

**Supplementary Table 3. Tear Cytokines per Affected Eye**

| **Patient** | **Affected Eye** | **IL-8** | **IL-6** | **IL-1b** | **IL-12** | **TNF-α** | **IL-10** |
| --- | --- | --- | --- | --- | --- | --- | --- |
| **1.Female** | OD | 1551.1 | 955 | 93.07 | 0 | 0 | 17.5 |
| OS | 10.96 | 0 | 0 | 0 | 0 | 0 |
| **2.Male** | OD | 2500 | 87 | 111 | 0 | 11.6 | 11 |
| OS | 317.6 | 8 | 0 | 0 | 6.2 | 0 |
| **3.Female** | OD | 531.4 | 86 | 12.2 | 0 | 5.62 | 15.8 |
| OS | 61 | 4.5 | 0 | 0 | 8.75 | 11.5 |
| **4.Female** | OD | 2500 | 2500 | 377.6 | 50 | 104 | 202.6 |
| OS | 2500 | 2500 | 161.4 | 3.8 | 13.4 | 156.6 |
| **5.Female** | OD | 530.7 | 171.7 | 19.02 | 8.78 | 8.04 | 7.68 |
| OS | 656.6 | 204.7 | 21.6 | 0 | 4.3 | 3.8 |
| **6.Female** | OD | ND | ND | ND | ND | ND | ND |
| OS | 975 | 46.29 | 72.77 | 62.4 | 22.4 | 88.51 |
| **7.Male** | OD | 235.4 | 5.62 | 4.21 | 0 | 0 | 3.59 |
| OS | 128.5 | 3 | 0 | 0 | 4.87 | 2.75 |
| **8.Male** | OD | 187.6 | 131.25 | 8.33 | 0 | 4.3 | 7.36 |
| OS | 184.2 | 32.6 | 4.2 | 0 | 0 | 4.6 |
| **9.Female** | OD | 2500 | 2382.5 | 142.5 | 0 | 0 | 77.5 |
| OS | 0 | 0 | 0 | 0 | 0 | 0 |
| **10.Male** | OD | 57.58 | 4.83 | 0 | 2.25 | 6.93 | 7.41 |
| OS | 637.7 | 19.5 | 18.5 | 13 | 10.25 | 13.5 |
| **11.Female** | OD | 2500 | 2500 | 498.6 | 24.65 | 14.65 | 16.39 |
| OS | 2500 | 2500 | 2500 | 0 | 6 | 51.8 |
| **12.Male** | OD | 2500 | 2500 | 2500 | 10.19 | 26.53 | 142.8 |
| OS | 2500 | 2500 | 1953.6 | 740 | 13.6 | 374.2 |
| **13.Female** | OD | 1783.3 | 183.3 | 0 | 0 | 0 | 31.66 |
| OS | 2500 | 2500 | 200 | 30 | 59.16 | 50.83 |
| **14.Female** | OD | 1700 | 77.04 | 0 | 0 | 7.72 | 7.04 |
| OS | 1258.6 | 45.5 | 9.5 | 4.6 | 7.66 | 6.33 |

ND. Not determined, insufficient sample.

**Supplementary Table 4. Correlation analysis**

|  | **Total Score** vs. **IL-12p70** | **Total Score** vs. **TNF-a** | **Total Score** vs. **IL-10** | **Total Score** vs. **IL-6** | **Total Score** vs. **IL-1b** | **Total Score** vs. **IL-8** |
| --- | --- | --- | --- | --- | --- | --- |
| **Spearman r** |  |  |  |  |  |  |
| r | 0.3552 | 0.319 | 0.2933 | 0.3387 | 0.3188 | 0.3913 |
| 95% confidence interval | -0.04055 to 0.6546 | -0.08117 to 0.6306 | -0.1180 to 0.6187 | -0.06804 to 0.6489 | -0.08143 to 0.6305 | -0.007424 to 0.6827 |
|  |  |  |  |  |  |  |
| **P value** |  |  |  |  |  |  |
| P (one-tailed) | **0.0345** | 0.0524 | 0.0729 | **0.0453** | 0.0525 | **0.024** |
| P value summary | ***** | NS | NS | ***** | NS | ***** |
| Exact or approximate P value? | Approximate | Approximate | Approximate | Approximate | Approximate | Approximate |
| Significant? (alpha = 0.05) | Yes | No | No | Yes | No | Yes |
|  |  |  |  |  |  |  |
| Number of XY Pairs | 27 | 27 | 26 | 26 | 27 | 26 |

**Note: Significant results are presented in bold.**

* Significant p-value.
